# Supplementary material
Source: PubMed Central journal article supplement (PMC6802741)

**Supplemental FIG 1: Serum histamine levels in female and male WT and CRF<sub>2</sub><sup>-/-</sup> mice.** 6-8 week old female and male WT and CRF<sub>2</sub><sup>-/-</sup> mice were sensitized overnight with IgE (i.p. injection) and challenged with either PBS vehicle (Control) or anti-IgE DNP to induce passive systemic anaphylaxis (PSA). Serum histamine levels were measured at 30 min post-vehicle or DNP challenge. Data are means ± SEM from a representative experiment with n=7 animals per group. Data were analyzed using a 2-way ANOVA, \*p<0.05, \*\*\*p<0.001. Experiments were repeated in 2 independent experiments.

**Supplemental FIG 2: Phenotype and morphology of CRF<sub>2</sub><sup>-/-</sup> BMMCs.** **A:** Representative image of 6-week old WT and CRF<sub>2</sub><sup>-/-</sup> BMMCs stained with Toluidine blue. **B:** β-hex measured in cell pellets from WT and CRF<sub>2</sub><sup>-/-</sup> BMMCs. **C:** Flow cytometry analysis of WT and CRF<sub>2</sub><sup>-/-</sup> BMMCs double stained for c-kit (Pacific blue-labeled cells, Y-axis) and FcεR1 (PE-labeled cells, X-axis). **E-G:** Mean fluorescence intensity (MFI) analysis for c-kit and FcεR1, and the % of c-kit/FcεR1 double-positive cells. **H:** Flow cytometry analysis of BMMCs stained with

726 primary CRF<sub>2</sub> antibody (right panel) or relevant isotype and secondary antibody controls (left,  
middle panels) as described in the materials and methods section.

728 **Supplemental FIG 3.** Expression of CRF<sub>1</sub> and CRF<sub>2</sub> in murine BMMCs and RBL-2H3 cells  
730 CRF<sub>2</sub> and CRF<sub>1</sub> gene expression in murine WT and CRF<sub>2</sub><sup>-/-</sup> BMMCs (A,B) and in CRF<sub>2</sub> over-  
expressed RBL-2H3 mast cells (B,D).

732 **Supplemental FIG 4. The CRF<sub>1</sub> antagonist Antalarmin attenuates heightened PSA-**  
733 **Induced histamine levels in CRF<sub>2</sub><sup>-/-</sup> mice.** C57B6 WT male mice (6-8 weeks of age),  
734 sensitized overnight with IgE (20 µg in 100 ul PBS), were administered PBS (vehicle) or the  
735 CRF<sub>1</sub> antagonist antalarmin (15 mg/kg, i.p.) 30 min prior to injection of DNP-HSA to induce  
736 passive systemic anaphylaxis (PSA). Plasma histamine levels in mice were measure at 30  
737 min post-PSA. \*p<0.05 vs. all other treatment groups (1-Way ANOVA), n=5-6 mice per  
738 treatment.

**Supplemental FIG 1:** PSA-induced serum histamine levels in female and male WT and CRF<sub>2</sub><sup>-/-</sup> mice

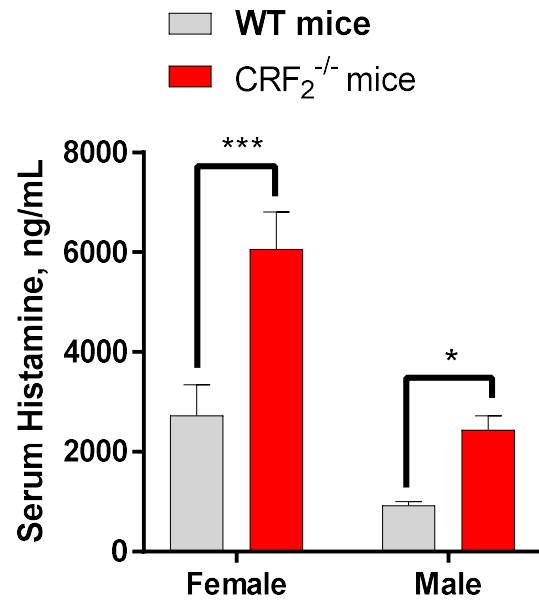

**Supplemental FIG 2: Phenotype and morphology of CRF<sub>2</sub><sup>-/-</sup> BMMCs**

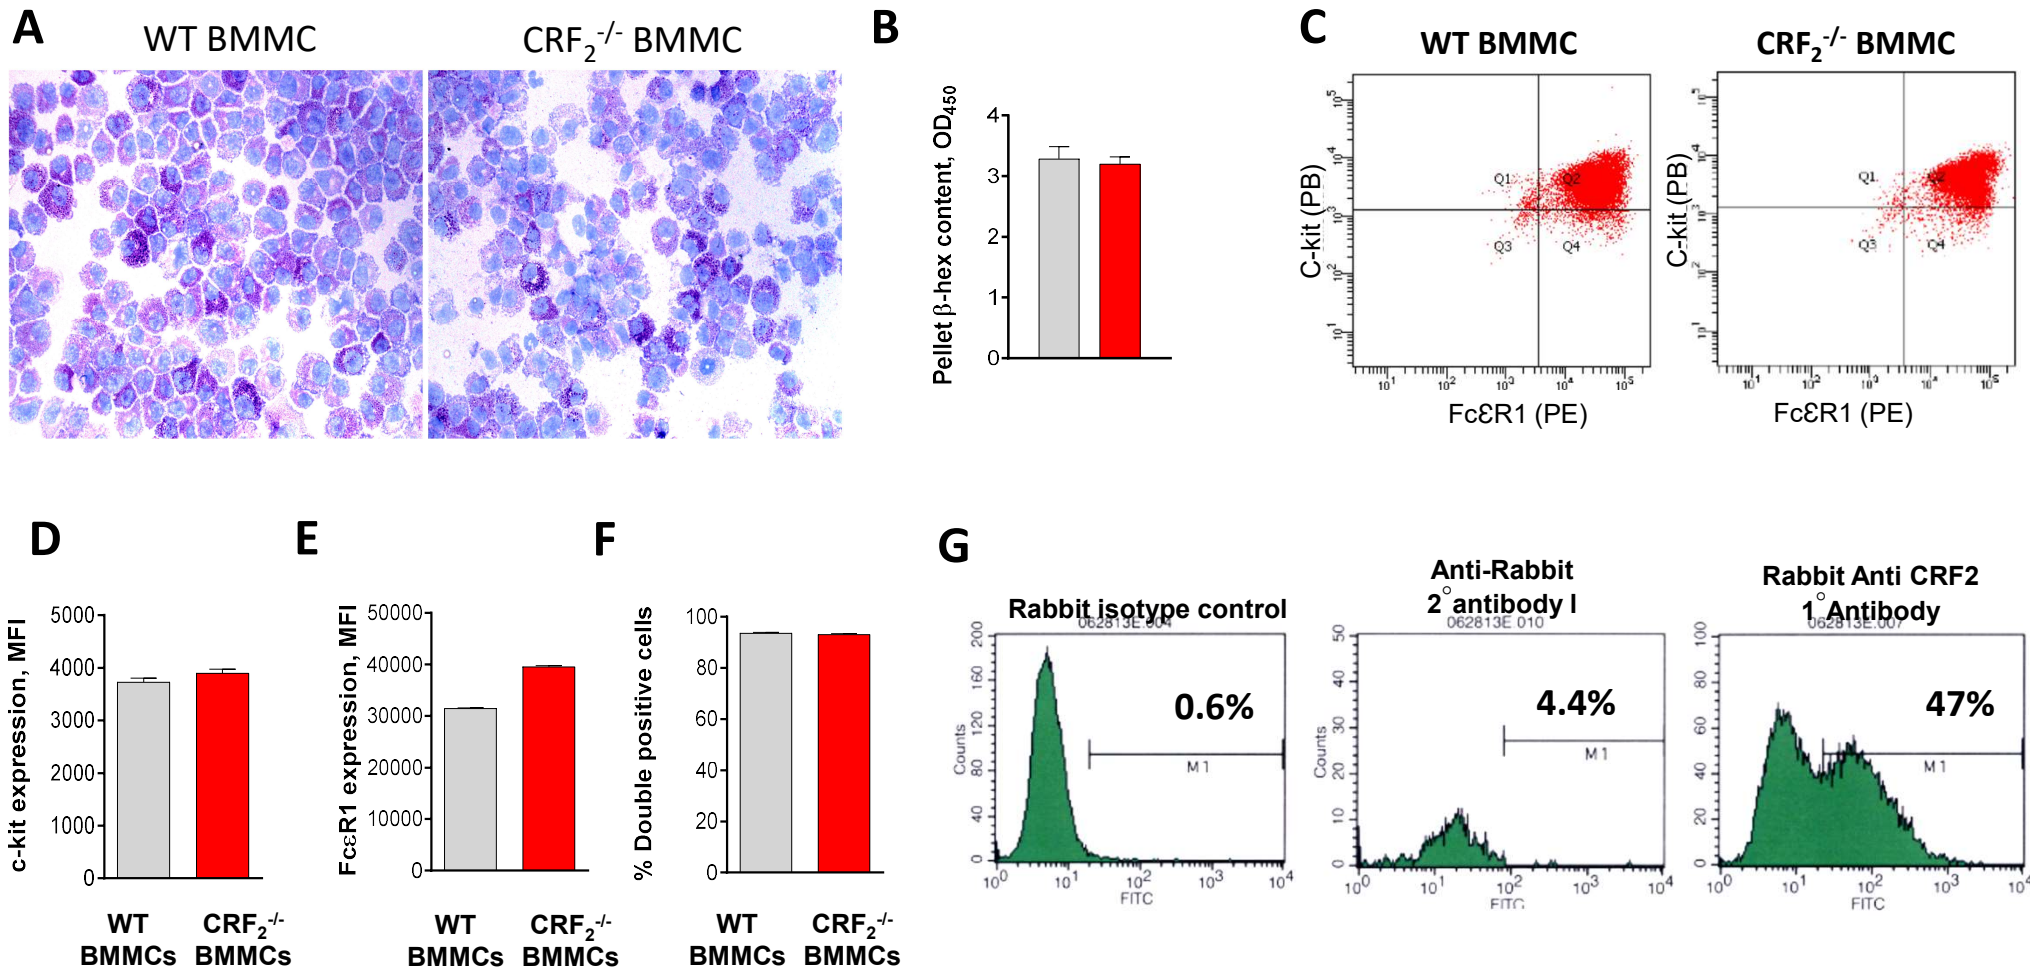

**Supplemental FIG 3:** Expression of CRF<sub>1</sub> and CRF<sub>2</sub> in murine BMMCs and RBL-2H3 cells

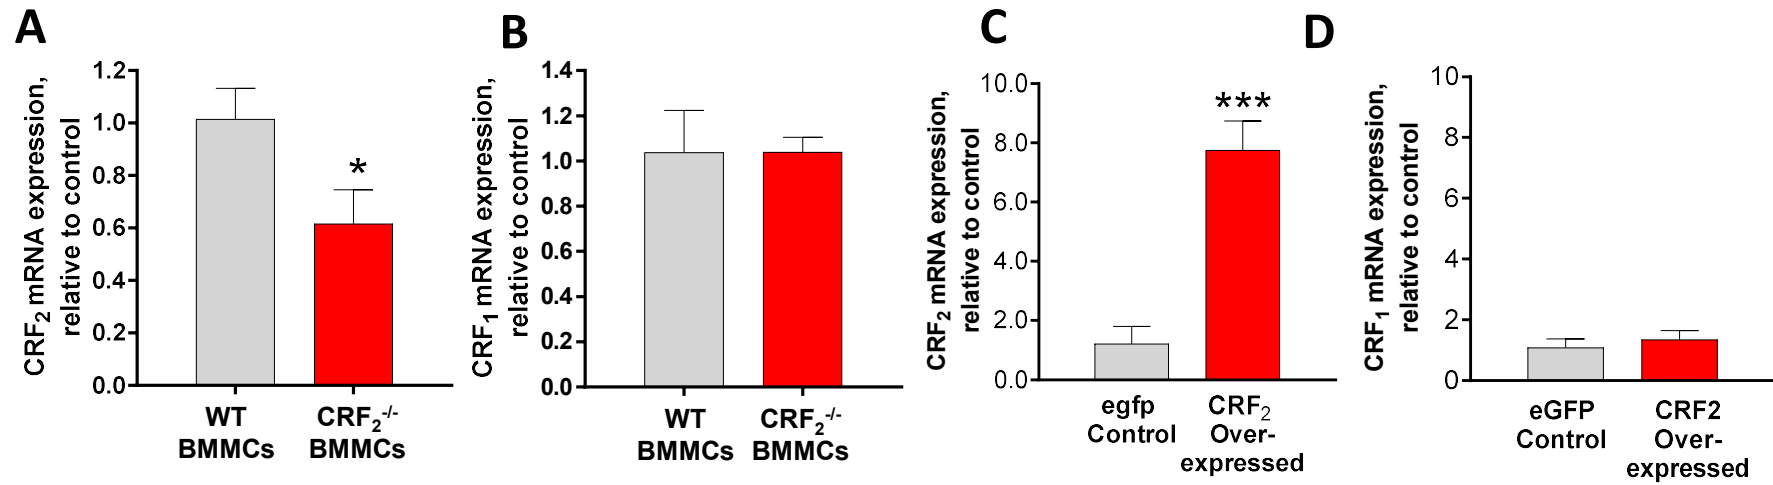

**Supplemental FIG. 4:** The CRF<sub>1</sub> antagonist Antalarmin attenuates heightened PSA-Induced histamine levels in CRF<sub>2</sub><sup>-/-</sup> mice

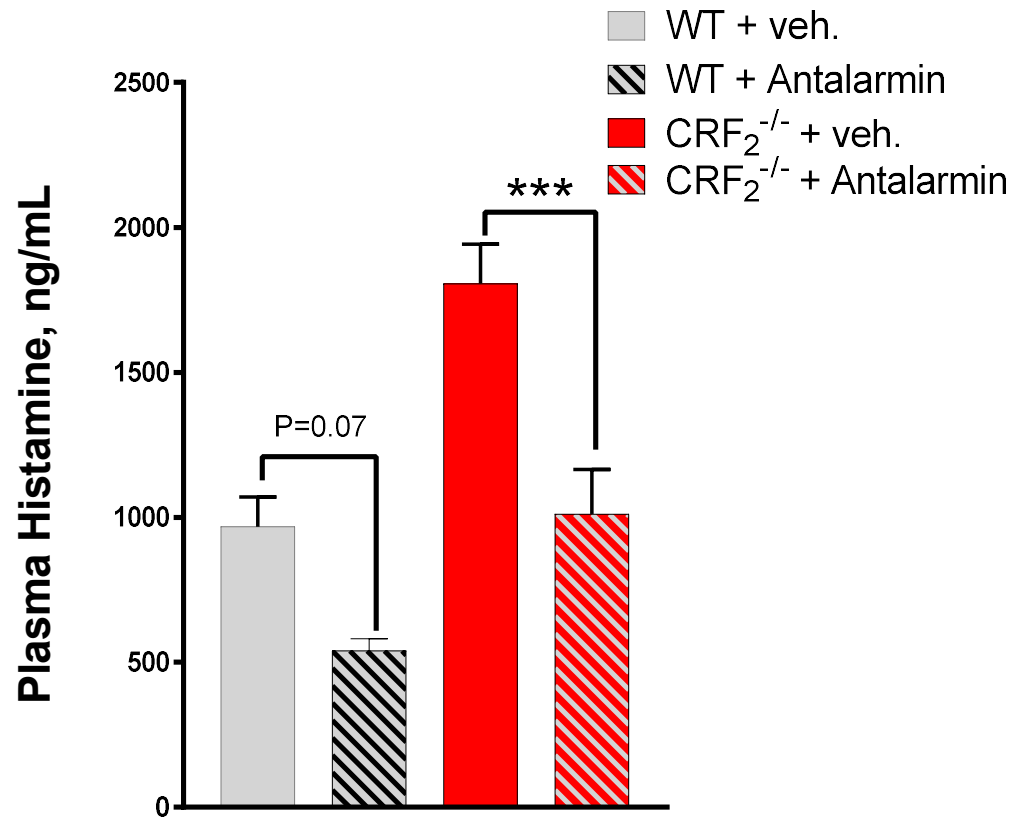

Supplement: NIHMS1512286-supplement-1.pdf [file NIHMS1512286-supplement-1.pdf]
